# Supplementary material for: An effective visible-light driven fumarate production from gaseous CO2 and pyruvate by the cationic zinc porphyrin-based photocatalytic system with dual biocatalysts
Source: Royal Society of Chemistry journal article supplement (doi:10.1039/d3dt03492e), 2023-11-27
Supplement: d3dt03492e1.pdf [file d3dt03492e1.pdf]

## Supporting information

### **An effective visible-light driven fumarate production from gaseous CO<sub>2</sub> and pyruvate by the cationic zinc porphyrin-based photocatalytic system with dual biocatalysts**

Mika Takeuchi<sup>a</sup> and Yutaka Amao<sup>a,b\*</sup>

<sup>a</sup> Graduate School of Science, Osaka Metropolitan University, 3-3-138 Sugimoto, Sumiyoshi-ku, Osaka 558-8585, Japan

<sup>b</sup> Research Centre of Artificial Photosynthesis (ReCAP), Osaka Metropolitan University, 3-3-138 Sugimoto, Sumiyoshi-ku, Osaka 558-8585, Japan,  
Email: amao@omu.ac.jp

## 1. Experimental setup for the isobaric system

Outline of experimental setup of the isobaric system for direct captured CO<sub>2</sub> gas utilization was shown in Figure S1.<sup>1</sup> In this system, the CO<sub>2</sub> gas in the balloon makes it possible to maintain a constant  $1.01325 \times 10^5$  Pa pressure in the reaction system.

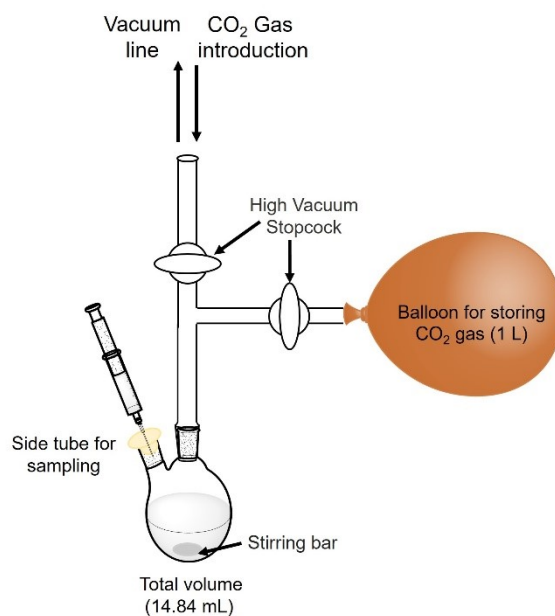

**Figure S1.** The experimental setup of the isobaric system for direct captured CO<sub>2</sub> gas utilization.

## 2. Determination for L-malate and fumarate concentration using ion chromatography

The concentrations of L-malate and fumarate were determined using ion chromatography system (Metrohm, Eco IC; electrical conductivity detector) with an ion exclusion column (Metrosep Organic Acids 250/7.8 Metrohm; column size: 7.8 x 250 mm; composed of 9  $\mu\text{m}$  polystyrene-divinylbenzene copolymer with sulfonic acid groups).<sup>1</sup> The 1.0 mM perchloric acid and 50 mM lithium chloride in aqueous solution were used as an eluent and a regenerant, respectively. Flow rate of eluent solution was adjusted to be 0.5 mL  $\text{min}^{-1}$ . The retention time for L-malate was detected at 10.11-10.13 min. The electrical conductivity changes in the various L-malate concentrations (0 – 1000  $\mu\text{M}$ ) during the ion chromatograph analysis were shown in Figure S2(a). Inset of Figure S2(a) shows the relationship between the L-malate concentration and the detection peak area using ion chromatograph.

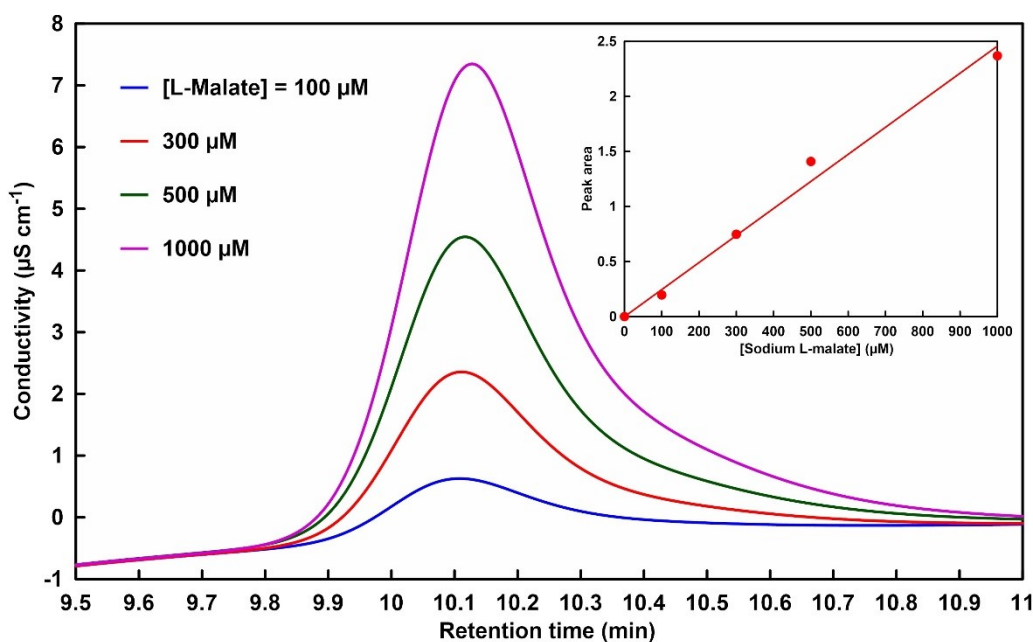

**Figure S2(a).** Chromatogram of sodium L-malate (0 - 1000  $\mu\text{M}$ ) in 50 mM-HEPES buffer (pH 7.0). Inset: Relationship between the L-malate concentration and the detection peak area.

As shown in the inset of Figure S2(a), the L-malate concentration and the detected peak area showed a good linear relationship (correlation coefficient:  $r^2=0.999$ ) as following equation (S1).

$$\text{Peak area} = 2.46 \times 10^{-3} \times [\text{L-malate}] (\mu\text{M}) \quad (\text{S1})$$

The retention time for fumarate was detected at 12.28-12.37 min. The electrical conductivity changes in the various sodium fumarate concentrations (0 – 1000  $\mu\text{M}$ ) during the ion chromatograph analysis were shown in Figure S2(b). Inset of Figure S2(b) shows the relationship between the sodium fumarate concentration and the

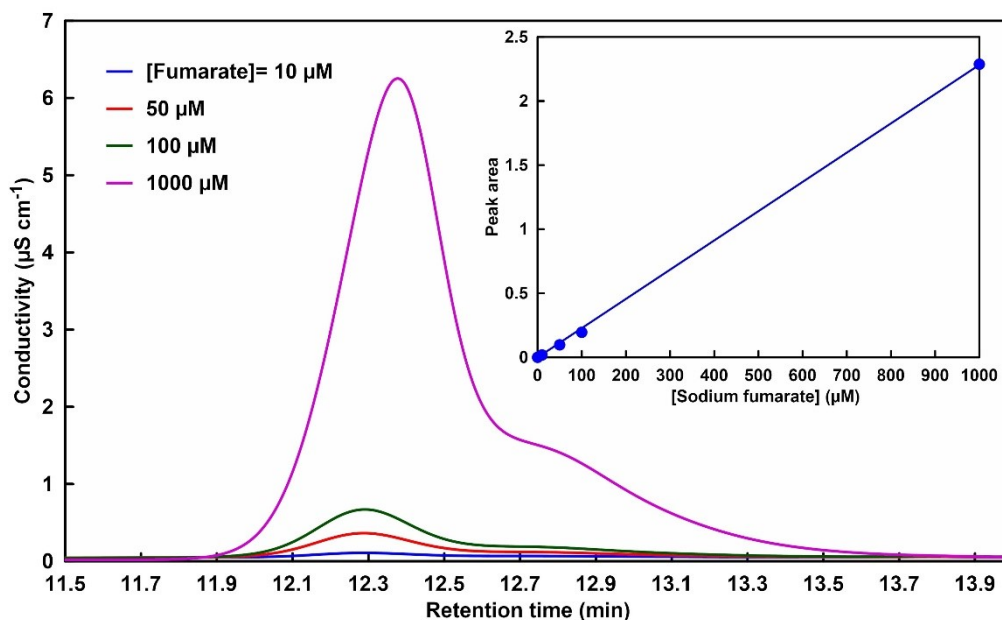

detection peak area using ion chromatograph.

**Figure S2(b).** Chromatogram of sodium fumarate (0 – 1000  $\mu\text{M}$ ) in 50 mM-HEPES buffer (pH 7.0). Inset: Relationship between the fumarate concentration and the detection peak area.

As shown in the inset of Figure S2(b), the fumarate concentration and the detected peak area showed a good linear relationship (correlation coefficient:  $r^2=0.999$ ) as following equation (S2).

$$\text{Peak area} = 2.28 \times 10^{-3} \times [\text{fumarate}] (\mu\text{M}) \quad (\text{S2})$$

### 3. Visible-light driven L-malate synthesis from pyruvate and CO<sub>2</sub> with the system of TEOA, zinc porphyrin, [Cp\*Rh(bpy)(H<sub>2</sub>O)]<sup>2+</sup>, NAD<sup>+</sup> and MDH

Figure S3 shows a chart of an ion chromatogram sampled from the reaction solution of sodium pyruvate (5.0 mM), magnesium chloride (5.0 mM), TEOA (0.2 M), ZnTMAP<sup>4+</sup> (50 μM), [Cp\*Rh(bpy)(H<sub>2</sub>O)]<sup>2+</sup> (10 μM), NAD<sup>+</sup>(0.5 mM) and MDH (0.7 U, *ca.* 1.6 μM) in 5 mL of 500 mM HEPES-NaOH buffer (pH 7.8) after 1 and 5 h irradiation. The gas phase was filled with CO<sub>2</sub> gas.

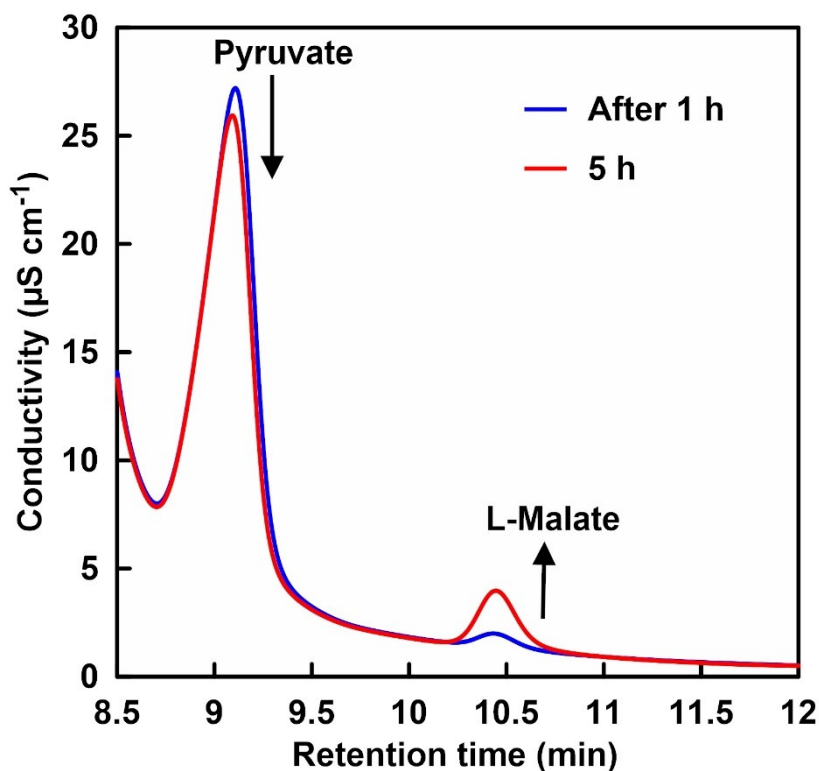

**Figure S3.** A chart of an ion chromatogram for pyruvate or L-malate concentration in the solution of sodium pyruvate (5.0 mM), magnesium chloride (5.0 mM), TEOA (0.2 M), ZnTMAP<sup>4+</sup> (50 μM), [Cp\*Rh(bpy)(H<sub>2</sub>O)]<sup>2+</sup> (10 μM), NAD<sup>+</sup>(0.5 mM) and MDH (0.7 U, *ca.* 1.6 μM) in 5 mL of 500 mM HEPES-NaOH buffer (pH 7.8) after 1 and 5 h irradiation. The gas phase was filled with CO<sub>2</sub> gas.

Figure S4 shows a chart of an ion chromatogram sampled from the reaction solution of sodium pyruvate (5.0 mM), magnesium chloride (5.0 mM), TEOA (0.2 M), ZnTPPS<sup>4+</sup> (10 μM), [Cp\*Rh(bpy)(H<sub>2</sub>O)]<sup>2+</sup> (10 μM), NAD<sup>+</sup>(0.5 mM) and MDH (0.7 U, *ca.* 1.6 μM) in 5 mL of 500 mM HEPES-NaOH buffer (pH 7.8) after 1 and 5 h irradiation. The gas phase was filled with CO<sub>2</sub> gas.

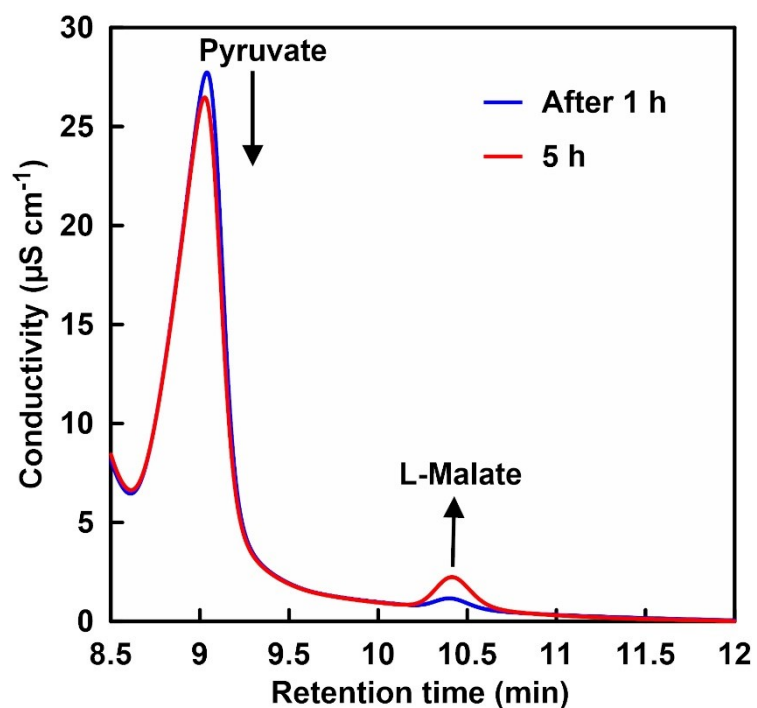

**Figure S4.** A chart of an ion chromatogram for pyruvate or L-malate concentration in the solution of sodium pyruvate (5.0 mM), magnesium chloride (5.0 mM), TEOA (0.2 M), ZnTPPS<sup>4-</sup> (10 μM), [Cp\*Rh(bpy)(H<sub>2</sub>O)]<sup>2+</sup> (10 μM), NAD<sup>+</sup> (0.5 mM) and MDH (0.7 U, *ca.* 1.6 μM) in 5 mL of 500 mM HEPES-NaOH buffer (pH 7.8) after 1 and 5 h irradiation. The gas phase was filled with CO<sub>2</sub> gas.

#### 4. Visible-light driven fumarate synthesis from pyruvate and CO<sub>2</sub> with the system of TEOA, zinc porphyrin, [Cp\*Rh(bpy)(H<sub>2</sub>O)]<sup>2+</sup>, NAD<sup>+</sup>, MDH and FUM

Figure S5 shows a chart of an ion chromatogram sampled from the reaction solution of sodium pyruvate (5.0 mM), magnesium chloride (5.0 mM), TEOA (0.2 M), ZnTMAP<sup>4+</sup> (50 μM), [Cp\*Rh(bpy)(H<sub>2</sub>O)]<sup>2+</sup> (10 μM), NAD<sup>+</sup> (0.5 mM), MDH (0.7 U, *ca.* 1.6 μM) and FUM (0.5 U; 1.3 nM) in 5 mL of 500 mM HEPES-NaOH buffer (pH 7.8) after 1 and 5 h

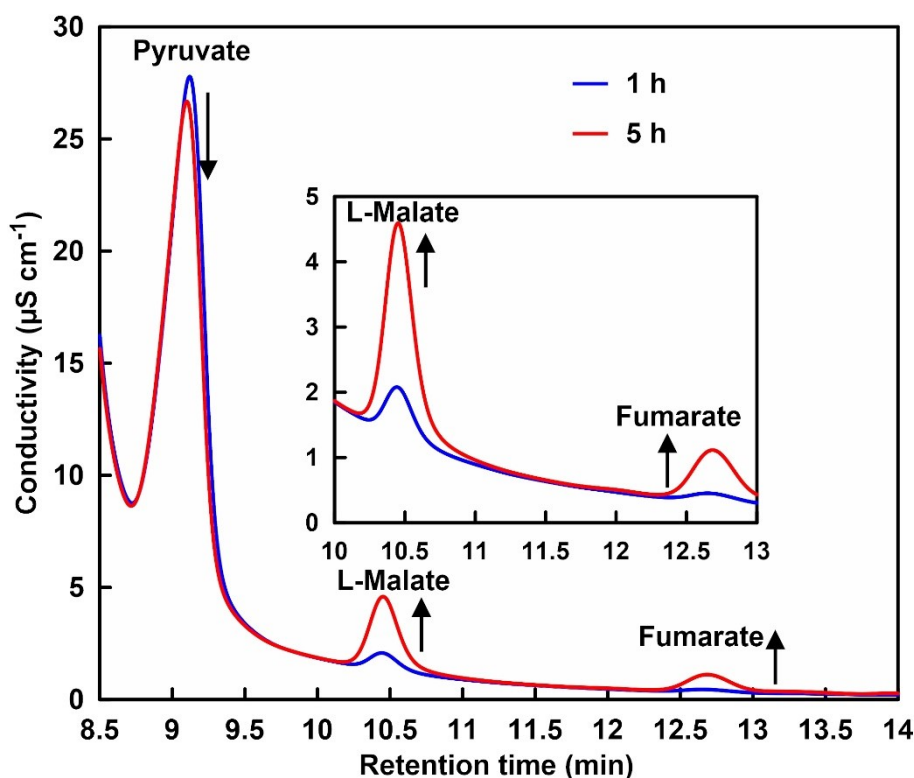

irradiation. The gas phase was filled with CO<sub>2</sub> gas.

**Figure S5.** A chart of an ion chromatogram for pyruvate, L-malate or fumarate concentration in the solution of sodium pyruvate (5.0 mM), magnesium chloride (5.0 mM), TEOA (0.2 M), ZnTMAP<sup>4+</sup> (50 μM), [Cp\*Rh(bpy)(H<sub>2</sub>O)]<sup>2+</sup> (10 μM), NAD<sup>+</sup> (0.5 mM), MDH (0.7 U, *ca.* 1.6 μM) and FUM (0.5 U; 1.3 nM) in 5 mL of 500 mM HEPES-NaOH buffer (pH 7.8) after 1 and 5 h irradiation. The gas phase was filled with CO<sub>2</sub> gas.

Figure S6 shows a chart of an ion chromatogram sampled from the reaction solution of sodium pyruvate (5.0 mM), magnesium chloride (5.0 mM), TEOA (0.2 M), ZnTPPS<sup>4+</sup> (10 μM), [Cp\*Rh(bpy)(H<sub>2</sub>O)]<sup>2+</sup> (10 μM), NAD<sup>+</sup> (0.5 mM), MDH (0.7 U, *ca.* 1.6 μM) and FUM (0.5 U; 1.3 nM) in 5 mL of 500 mM HEPES-NaOH buffer (pH 7.8) after 1 and 5 h

irradiation. The gas phase was filled with CO<sub>2</sub> gas.

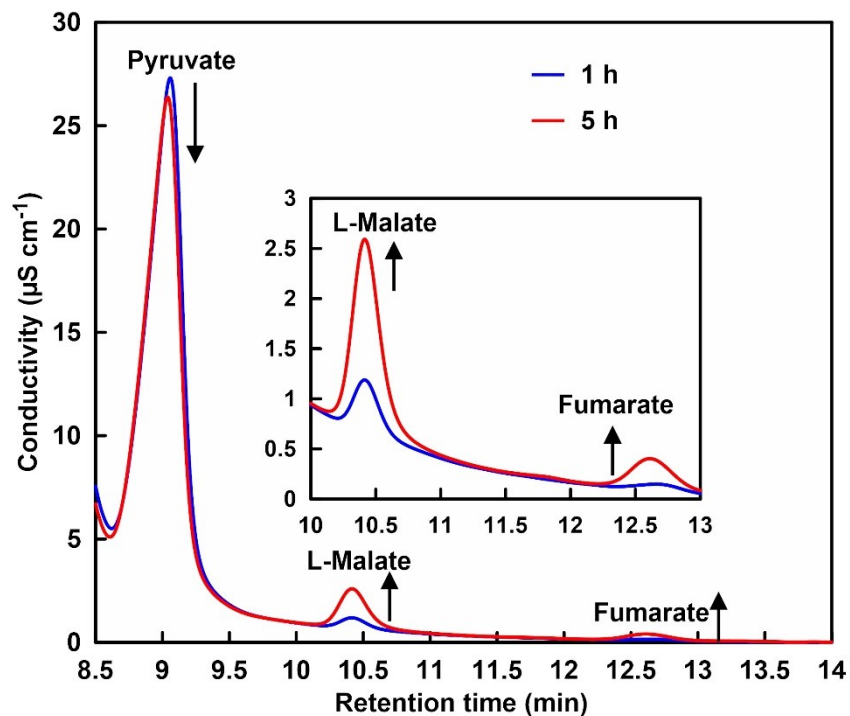

**Figure S6.** A chart of an ion chromatogram for pyruvate, L-malate or fumarate concentration in the solution of sodium pyruvate (5.0 mM), magnesium chloride (5.0 mM), TEOA (0.2 M), ZnTPPS<sup>4-</sup> (10 μM), [Cp\*Rh(bpy)(H<sub>2</sub>O)]<sup>2+</sup> (10 μM), NAD<sup>+</sup> (0.5 mM), MDH (0.7 U, *ca.* 1.6 μM) and FUM (0.5 U; 1.3 nM) in 5 mL of 500 mM HEPES-NaOH buffer (pH 7.8) after 1 and 5 h irradiation. The gas phase was filled with CO<sub>2</sub> gas.

Figure S7 shows a chart of an ion chromatogram sampled from the reaction solution of sodium pyruvate (5.0 mM), magnesium chloride (5.0 mM), TEOA (0.2 M), ZnTPPS<sup>4-</sup> (50 μM), [Cp\*Rh(bpy)(H<sub>2</sub>O)]<sup>2+</sup> (10 μM), NAD<sup>+</sup> (0.5 mM), MDH (0.7 U, *ca.* 1.6 μM) and FUM (0.5 U; 1.3 nM) in 5 mL of 500 mM HEPES-NaOH buffer (pH 7.8) after 1 and 5 h irradiation. The gas phase was filled with CO<sub>2</sub> gas.



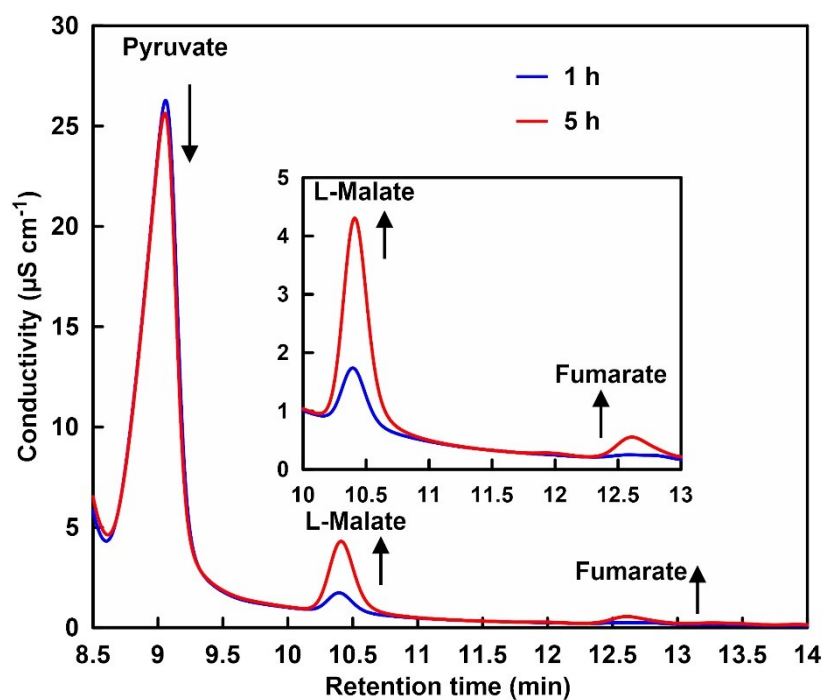

**Figure S7.** A chart of an ion chromatogram for pyruvate, L-malate or fumarate concentration in the solution of sodium pyruvate (5.0 mM), magnesium chloride (5.0 mM), TEOA (0.2 M), ZnTPPS<sup>4-</sup> (50  $\mu\text{M}$ ), [Cp\*Rh(bpy)(H<sub>2</sub>O)]<sup>2+</sup> (10  $\mu\text{M}$ ), NAD<sup>+</sup> (0.5 mM), MDH (0.7 U, *ca.* 1.6  $\mu\text{M}$ ) and FUM (0.5 U; 1.3 nM) in 5 mL of 500 mM HEPES-NaOH buffer (pH 7.8) after 1 and 5 h irradiation. The gas phase was filled with CO<sub>2</sub> gas.
